Beecraft and Rooney. 2020. Bioconcentration of glyphosate in wetland biofilms. PREPRINT. Contact [rrooney@uwaterloo.ca](mailto:rrooney@uwaterloo.ca)

# 1 Bioconcentration of glyphosate in wetland biofilms

2

3 Laura Beecraft <sup>a</sup>

4 [lnjbeecr@uwaterloo.ca](mailto:lnjbeecr@uwaterloo.ca)

5

6 Rebecca Rooney <sup>a\*</sup>

7 [rebecca.rooney@uwaterloo.ca](mailto:rebecca.rooney@uwaterloo.ca)

8 \*Corresponding author

9

10 <sup>a</sup>Department of Biology, University of Waterloo

11 200 University Ave. W.

12 Waterloo ON N2L 3G1

13

14

Beecraft and Rooney. 2020. Bioconcentration of glyphosate in wetland biofilms. PREPRINT. Contact [rrooney@uwaterloo.ca](mailto:rrooney@uwaterloo.ca)

## 15 **Abstract**

16 Wetland biofilms were exposed to the herbicide glyphosate via *in situ* field exposures and  
17 controlled microcosm experiments to measure bioconcentration and metabolism of glyphosate by  
18 biofilm organisms. Glyphosate concentrations in biofilms were orders of magnitude higher than  
19 the surrounding water, bioconcentration factors averaged 835 and 199 in field- and lab-exposed  
20 biofilms, respectively. Glyphosate in water where it had been detected in biofilms at field-  
21 exposed sites ranged from below detection (<0.001 ppm) up to 0.13 ppm. Glyphosate  
22 bioconcentration in biofilms was inversely proportional to levels in the surrounding water, and  
23 the retention kinetics were similar to both adsorption and enzymatic models. Microorganisms  
24 present in both the water and biofilms metabolized glyphosate to its primary breakdown product  
25 aminomethyl phosphonic acid (AMPA), with increased rates of breakdown in and around the  
26 biofilms. Photosynthetic efficiency of the algae within the biofilms was not affected by 24 h  
27 glyphosate controlled exposures. Our results demonstrate the role of biofilms in improving  
28 wetland water quality by removing contaminants like glyphosate, but also as a potential exposure  
29 route to higher trophic levels via consumption. Due to bioconcentration of pesticides, exposure  
30 risk to organisms consuming or living in biofilms may be much higher than indicated by  
31 concentrations in ambient water samples.

32  
33 **Keywords:** aminomethyl phosphonic acid (AMPA); periphyton; retention; marsh; bioaccumulation;  
34 herbicide

35

Beecraft and Rooney. 2020. Bioconcentration of glyphosate in wetland biofilms. PREPRINT. Contact [rrooney@uwaterloo.ca](mailto:rrooney@uwaterloo.ca)

## 36 1 Introduction

37 Since its introduction in 1974, use of the systemic, broad-spectrum herbicide glyphosate [N-  
38 (phosphonomethyl)glycine] has expanded dramatically in agriculture, silviculture, and the  
39 management of invasive plants (e.g. Annett et al., 2014; Breckels and Kilgour, 2018). Over 8.6  
40 billion kg of the active ingredient has been applied worldwide, making glyphosate the most  
41 heavily used herbicide globally (Benbrook, 2016). Its enthusiastic adoption is attributed in part to  
42 the advent of transgenic, glyphosate resistant crops in the mid-1990s and the establishment of an  
43 inexpensive generic supply following Monsanto's US patent expiry (Duke and Powles, 2008).  
44 Growing glyphosate use is also attributed to the development of glyphosate resistant weeds and  
45 its increasing application as a crop desiccant (Myers et al., 2016). As a result of its widespread  
46 use, glyphosate has become a ubiquitous contaminant in aquatic ecosystems (Battaglin et al.,  
47 2014; Carles et al., 2019; Lupi et al., 2019; Majewski et al., 2014; Medalie et al., 2020; Montiel-  
48 León et al., 2019).

49 Glyphosate works by inhibiting the enzyme 5-enolpyruvylshikimate-3-phosphate  
50 synthase (EPSPS), which blocks the shikimic acid pathway for aromatic amino acid synthesis in  
51 plants and susceptible microorganisms, including some bacteria and microalgae (Amrhein et al.,  
52 1980; Solomon and Thompson, 2003). Because the shikimic acid pathway is absent in animals  
53 (Starcevic et al., 2008), glyphosate is considered a low toxicity risk to non-target biota [e.g.  
54 15,16]. More, glyphosate's physicochemical properties yield a low environmental risk profile  
55 ((WHO), 2005; Giesy et al., 2000). Glyphosate is highly soluble in water (water solubility =  
56  $10,000 - 15,700 \text{ mg}\cdot\text{L}^{-1}$  at  $25 \text{ }^\circ\text{C}$ ; (Annett et al., 2014)), has a low octanol-water partition  
57 coefficient ( $\log K_{ow} = -3.2$ ; (Henderson et al., 2010)), adsorbs strongly to soil and sediment (soil  
58 adsorption coefficient =  $24,000 \text{ L}\cdot\text{kg}^{-1}$ ; (Annett et al., 2014)), and can be rapidly broken down

Beecraft and Rooney. 2020. Bioconcentration of glyphosate in wetland biofilms. PREPRINT. Contact [rrooney@uwaterloo.ca](mailto:rrooney@uwaterloo.ca)

59 by microbial degradation (Silva et al., 2018; Solomon and Thompson, 2003). These factors  
60 contribute to a relatively short but variable half-life in water (1-91 days) (Hébert et al., 2019),  
61 and the expectation that glyphosate is rapidly dissipated from aquatic environments, with low  
62 likelihood of bioaccumulation, and minimal risk to aquatic biota (Breckels and Kilgour, 2018;  
63 Siemering et al., 2008; Solomon and Thompson, 2003).

64 Paradoxically, despite consistent findings of low toxicity to animals from ecotoxicology  
65 studies (Annett et al., 2014; Breckels and Kilgour, 2018; Giesy et al., 2000; Solomon and  
66 Thompson, 2003), some studies suggest that even low glyphosate concentrations may cause  
67 disruption of endocrine systems, hepatorenal damage, birth defects, teratogenic effects and  
68 alterations of the microbiome in mammals and insects (reviewed in Myers et al., 2016).  
69 Glyphosate has been shown to alter algal and bacterial abundance (Berman et al., 2020; Pizarro  
70 et al., 2016) and composition (Pérez et al., 2017; Smedbol et al., 2018) in both plankton and  
71 biofilm communities (Janßen et al., 2019; Kish, 2006; Vera et al., 2010), and it is now being  
72 recognized as a possible agent of eutrophication (Hébert et al., 2019). This is because the  
73 microbial breakdown of glyphosate releases bioavailable phosphorus (e.g. Carles et al., 2019),  
74 favoring microbes that can degrade glyphosate under low phosphorus conditions (Berman et al.,  
75 2020).

76 What can explain this paradox? Ecotoxicological studies of glyphosate face a variety of  
77 limitations (reviewed in Annett et al., 2014)(Annett et al., 2014). Notably, most ecotoxicology  
78 research examining the effects of glyphosate on aquatic organisms focuses on direct exposure  
79 through immersion in glyphosate contaminated water, but there may be other ecologically  
80 significant exposure pathways. For example, glyphosate adsorbs to sediment and can be taken up  
81 by both bacterial and algal cells (Forlani et al., 2008; Sviridov et al., 2015; S. Wang et al., 2016),

Beecraft and Rooney. 2020. Bioconcentration of glyphosate in wetland biofilms. PREPRINT. Contact [rrooney@uwaterloo.ca](mailto:rrooney@uwaterloo.ca)

82 including active and passive uptake pathways for biofilms (Battin et al., 2016). Biofilms are  
83 complex communities including bacteria, archaea, algae, viruses, fungi and protists living at the  
84 interface of substrates and the surrounding water (Battin et al., 2016; Besemer, 2015; Cui et al.,  
85 2017). The sediment and fine particles that collect in biofilms, the complex and often  
86 polyanionic nature of their exopolysaccharides, and the high-water content (Chaumet et al.,  
87 2019; Sutherland, 2001) may facilitate glyphosate bioconcentration in biofilms despite its low  
88 octanol-water partition coefficient and high water solubility. Recently, Fernandes et al. (2019)  
89 demonstrated that river biofilms in Brazil are capable of taking up glyphosate, and Klátyik et al.  
90 (2017) and Carles et al. (2019) confirmed through microcosm studies that river biofilms are  
91 capable of breaking it down. Rooney et al. (2020) observed that wetland biofilms can  
92 bioconcentrate a diverse array of agrochemicals at concentrations much higher than the  
93 surrounding ambient water. However, glyphosate was not among the pesticides examined in that  
94 study. If biofilms are bioconcentrating glyphosate from the ambient environment, biofilm grazers  
95 like invertebrates, snails, tadpoles and fish larvae might be exposed to higher concentrations of  
96 glyphosate than anticipated from water quality monitoring.

97 To establish whether wetland biofilms were bioconcentrating glyphosate, we employed a  
98 combination of field and controlled dose-response laboratory experiments. Our first objective  
99 was to determine the relationship between exposure dose and bioconcentration of glyphosate in  
100 wetland biofilms. In particular, we aim to test the hypothesis that if glyphosate is  
101 bioconcentrating in wetland biofilms, it is through an adsorption mechanism that would fit a  
102 saturation model. Our second objective was to assess whether wetland biofilms (i.e. the  
103 microorganisms within them) were metabolizing glyphosate to yield glyoxylate and  
104 aminomethyl-phosphonic acid (AMPA) (Sviridov et al., 2015), leading to the accumulation of

Beecraft and Rooney. 2020. Bioconcentration of glyphosate in wetland biofilms. PREPRINT. Contact rrooney@uwaterloo.ca

105 AMPA in biofilms or ambient water. Our third objective was to assess if short-term glyphosate  
106 exposure affected the photochemical efficiency of the algal component of wetland biofilms,  
107 based on measurements of variable chlorophyll *a* fluorescence during the exposure period, as this  
108 could indicate cellular stress leading to metabolic changes of these autotrophs over extended  
109 exposures.

## 110 2 Methods

### 111 2.1 Biofilm colonization set-up

112 All biofilms were colonized *in situ* on artificial substrates comprising acrylic plates  
113 measuring 44.5 x 20.2 x 0.6 cm. These artificial substrates were installed as arrays, each  
114 consisting of 4 or 5 plates suspended vertically in the water column from marine buoys to hang  
115 ca. 10 cm below the surface of the water (Supplementary Materials Figure S1). Arrays were  
116 installed in areas of open water within the study marsh (Figure 1) at sites with 50-100 cm of  
117 standing water. These sites were selected to reduce shading from emergent or overhanging  
118 terrestrial vegetation and to avoid disturbance from boat traffic.

### 119 2.2 Field-exposed biofilm installation and collection

120 Arrays were deployed in areas of open water within coastal marsh habitat in Rondeau Provincial  
121 Park (2016) and Long Point Provincial Park (2017, 2018) (Figure 1) as part of a large-scale  
122 environmental monitoring program designed around the application of glyphosate-based  
123 herbicide (Roundup Custom® for Aquatic and Terrestrial Use Liquid Herbicide, registration  
124 #32356), containing glyphosate as an isopropylamine salt with an alcohol ethoxylate surfactant  
125 (Aquasurf®, registration #32152) to control the invasive wetland grass *Phragmites australis*.  
126 The direct application of glyphosate to *P. australis* in standing water was permitted under an

Beechcraft and Rooney. 2020. Bioconcentration of glyphosate in wetland biofilms. PREPRINT. Contact [rrooney@uwaterloo.ca](mailto:rrooney@uwaterloo.ca)

127 Emergency Use Registration from Health Canada's Pest Management Regulatory Authority and  
128 a Permit to Perform an Aquatic Extermination from Ontario's Ministry of Environment  
129 Conservation and Parks.

130 Artificial substrates were given a minimum of four weeks for *in situ* biofilm colonization  
131 prior to the date of first collection. Plates were collected from the arrays at each site on three  
132 different dates: prior to glyphosate application, 24 h after application, and approximately 40 days  
133 after application. Plates were removed from the arrays, stored in zipper-seal bags and transported  
134 in coolers back to the lab. There, we harvested the biofilm by scraping with clean cell scrapers  
135 from the plate into a Whirlpak bag and rinsing any residual biomass with small amounts of  
136 distilled/de-ionized water. All implements (scraper and funnel) were thoroughly rinsed with  
137 deionized water between samples. Due to the high level of spatial heterogeneity of the biofilms  
138 and the biomass requirements for analysis, samples from replicate plates were composited to  
139 generate a single sample per array from each sampling date and site. Samples were stored frozen  
140 and then freeze dried prior to analysis for glyphosate and AMPA by the Agriculture and Food  
141 Lab (AFL) at the University of Guelph, using the method described in 'Chemical analyses,'  
142 below.

143 At the time of plate collection in the field, we collected a depth-integrated water sample  
144 from each site using a plexiglass tube transferred to a polyethylene sample bottle, both triple-  
145 rinsed with site water. Samples were stored on ice during transport, and then frozen until  
146 delivery to AFL for analysis of glyphosate and AMPA.

147

Beecraft and Rooney. 2020. Bioconcentration of glyphosate in wetland biofilms. PREPRINT. Contact [rooney@uwaterloo.ca](mailto:rooney@uwaterloo.ca)

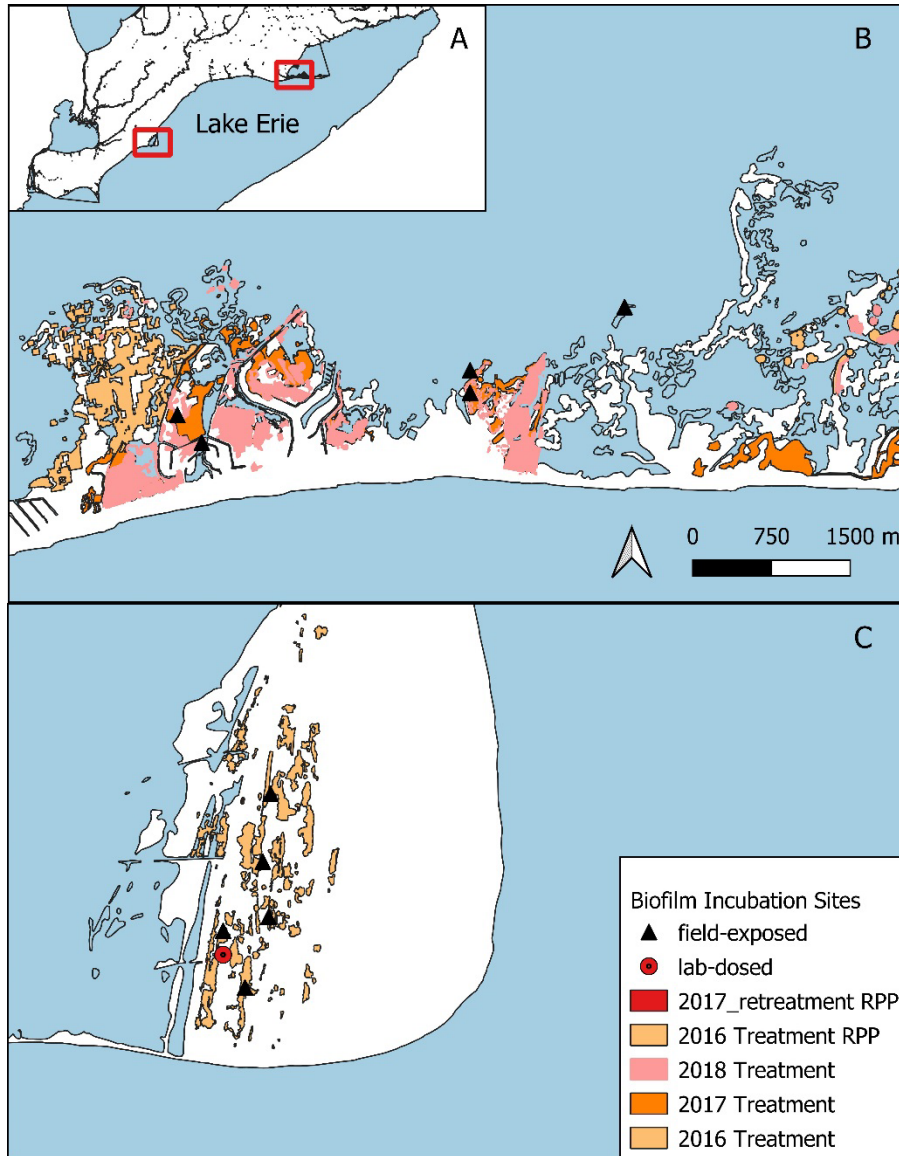

148

149 Figure 1. Installation sites of biofilm sampling arrays in A) two Lake Erie coastal marshes: B) Long Point  
150 Provincial Park (LPP) and C) Rondeau Provincial Park (RPP), Ontario Canada. At field-exposed sites  
151 (black triangles), biofilms colonized on artificial substrates were exposed to glyphosate applied to areas of  
152 the wetland, indicated by colour-shaded regions corresponding to treatment areas in respective years. At  
153 the 'lab-dosed' site (red circle, panel C), biofilms colonized on artificial substrates were collected and  
154 transported back to the lab for controlled exposures to glyphosate in microcosms.



Beecraft and Rooney. 2020. Bioconcentration of glyphosate in wetland biofilms. PREPRINT. Contact rrooney@uwaterloo.ca

155 This map was created using QGIS and shape files from Government of Canada, Statistics Canada, 2016  
156 Census, in the EPSG:3347, NAD83 / Statistics Canada Lambert Projection.

## 157 2.3 Laboratory-Dosed biofilms

### 158 2.3.1 Biofilm collection

159 We installed arrays containing 15 plates for the laboratory experiments in May 2018 in an open  
160 water coastal marsh site in Rondeau Provincial Park, Ontario (Figure 1C). We selected the  
161 incubation location based on 2017 surveys, where we found no detectable levels of glyphosate  
162 residue in the water or sediment. We retrieved the plates in July and transported them to the  
163 culturing facility at the University of Waterloo in coolers, placed in high-density polyethylene  
164 (HDPE) racks such that they remained upright and immersed in 100 µm-filtered lake water.

### 165 2.3.2 Laboratory set up

166 We maintained the field-colonized biofilms in laboratory microcosms under controlled  
167 conditions. Microcosms comprised glass aquaria (ca. 37 L volume) lined with polyethylene bags  
168 to ensure glyphosate was not lost via adsorption to the glass (personal comm. from AFL to R.  
169 Rooney). Eight aquaria were filled with 100 µm filtered lake water to a volume of 28 L. The  
170 artificial substrates were held vertically (the same orientation as *in situ* colonization) in the  
171 HDPE racks. The colonized plates were distributed randomly among 5 microcosms, such that  
172 each microcosm contained 3 plates. The remaining 3 microcosms contained filtered lake water  
173 and 3 clean, un-colonized, plates each, which we used as experimental controls to account for  
174 glyphosate loss and/or metabolism occurring in the filtered lake water itself, and possible  
175 adsorption of glyphosate to the acrylic plates. We left the microcosms for 72 h to equilibrate to  
176 laboratory growth conditions: 40 µmol photons · m<sup>2</sup>·s<sup>-1</sup> at water surface from cool white  
177 fluorescent lights under a 16:8 hr light: dark cycle and constant aeration from air pumps and

Beecraft and Rooney. 2020. Bioconcentration of glyphosate in wetland biofilms. PREPRINT. Contact rrooney@uwaterloo.ca

178 diffuser tubes (Supplementary Materials Figure S2). Temperature and dissolved oxygen were  
179 maintained at  $21 \pm 1$  °C and  $8.7 \pm 0.1$  mg·L<sup>-1</sup> (ca. 100%), respectively, though dissolved oxygen  
180 briefly reached 70-80% saturation in the coolers during transport to the culturing facility. Water  
181 level was maintained at 28 L with additions of filtered lake water to replaces losses from  
182 evaporation.

### 183 2.3.3 Glyphosate exposure

184 The microcosms were exposed to different concentrations of glyphosate for 24 h in a  
185 regression design. Treatments for microcosms containing colonized plates ('colonized  
186 microcosms') had nominal glyphosate concentrations of 0, 0.01, 0.1, 1.0 and 10 mg glyphosate  
187 a.e. · L<sup>-1</sup>, respectively, and 0, 0.1 and 10 mg glyphosate a.e. · L<sup>-1</sup> for the microcosms containing  
188 clean plates ('control microcosms'). These exposure levels were chosen to encompass  
189 concentrations observed in natural surface waters by other researchers (Annett et al., 2014;  
190 Battaglin et al., 2014) and to create a gradient from which to assess glyphosate bioconcentration.  
191 To achieve the desired exposure levels, we added glyphosate from a stock solution (480 mg  
192 glyphosate a.e. · L<sup>-1</sup>) made from a dilution of RoundUp Custom® (original concentration of 480  
193 g glyphosate a.e. · L<sup>-1</sup>).

194 After 24 h, we collected water samples from each microcosm to compare measured and  
195 nominal concentrations. Samples were taken in acid washed polyethylene sample bottles, rinsed  
196 in triplicate with sample water. We harvested the biofilms from the plates using scraping tools  
197 (plastic putty knives), rinsed thoroughly with de-ionized water between samples. Biofilms from  
198 the three plates in each tank were composited, transferred to Whirlpak bags and frozen. Samples  
199 were freeze-dried at -50°C. Water and biofilm samples were stored frozen until delivery to AFL  
200 for analysis of glyphosate and AMPA.

Beecraft and Rooney. 2020. Bioconcentration of glyphosate in wetland biofilms. PREPRINT. Contact [rrooney@uwaterloo.ca](mailto:rrooney@uwaterloo.ca)

201           During the 24 h glyphosate exposure period, we used a pulse-amplitude modulated  
202 chlorophyll *a* (Chl *a*) fluorometer (Diving-PAM, Walz Effeltrich Germany) to measure the  
203 quantum yield of photochemistry ( $\Delta F/F_m'$ ) of the photosynthetic organisms within the biofilms,  
204 to detect stress responses of Photosystem II photochemistry due to glyphosate exposure. The  
205 Diving-PAM measures background fluorescence (*F*) using low intensity, non-actinic, modulated  
206 red light (655 nm LED), followed by a saturating pulse of red light, which oxidizes all reaction  
207 centers and induces maximum fluorescence ( $F_m'$ ) (Hiriart-Baer et al., 2008; Walz GmbH, 1998).  
208 We measured both background and maximum fluorescence in the light-adapted state, as it was  
209 not possible to dark-adapt the biofilms on the plates while taking replicate measurements and  
210 without removal from their respective treatment microcosms.  $\Delta F/F_m'$  is calculated as  $(F_m' - F)/$   
211  $F_m'$  (Cosgrove and Borowitzka, 2010). A magnetic sample holder was attached to the fiber-optic  
212 sensor to ensure the sensor remained a constant distance from the sample during measurement.  
213 Ten replicate measures at different locations were taken on each of the three colonized plates for  
214 each treatment, starting with pre-exposure (time 0) and then 0.5, 1, 2, 3, 6 and 24 h post-dose,  
215 rinsing the sensor thoroughly between microcosms.

## 216 2.4 Chemical Analyses

217           The Agriculture and Food Laboratory (AFL) at the University of Guelph conducted the  
218 analyses of glyphosate and AMPA for all water and biofilm samples (limits of detection,  
219 Supplementary Materials Table S1). Samples were first homogenized, fortified with internal  
220 standard and then centrifuged. The supernatant was then acidified prior to liquid chromatography  
221 and mass spectrometry, and the samples quantified using a ratio of external to internal standard.  
222 Results are reported in ppm, equivalent to  $\text{mg}\cdot\text{L}^{-1}$ .

Beecraft and Rooney. 2020. Bioconcentration of glyphosate in wetland biofilms. PREPRINT. Contact [rrooney@uwaterloo.ca](mailto:rrooney@uwaterloo.ca)

## 223 2.5 Statistical Analyses

224 Linear regression analyses were used to determine how AMPA concentration in biofilm  
225 tissues or water depends on the glyphosate concentration in that same substrate. The adsorption  
226 of glyphosate to the biofilm from the surrounding water was modelled using both adsorption (1)  
227 and enzyme (2) kinetics. We considered an adsorption and enzymatic model because both  
228 processes may be occurring in the glyphosate-biofilm interaction; glyphosate is adsorbing to the  
229 different biofilm components, but is also being taken up and metabolized by cells/organisms  
230 within the biofilm. The Freundlich adsorption isotherm (1) is an empirical relationship between  
231 solute adsorbed to a surface and solute in the surrounding liquid, which can be expressed as:

$$232 \quad C_s = KC_e^{1/n} \quad (1)$$

233 Where  $C_s$  is the concentration of adsorbed herbicide,  $C_e$  is the herbicide concentration in the  
234 surrounding water at equilibrium,  $K$  is the Freundlich adsorption constant, and  $1/n$  is a constant  
235 relating adsorption to pressure (Alister et al., 2010). The Freundlich adsorption isotherm can be  
236 determined in relation to either equilibrium pressure or concentration of the adsorbate; we are  
237 using the latter and assuming that equilibrium concentrations of glyphosate in the microcosms  
238 had been reached at 24 h, supported by previous studies of pesticide accumulation in biofilms  
239 (Chaumet et al., 2019; Lundqvist et al., 2012).

240 The Michaelis-Menten equation models enzyme kinetics by relating enzyme reaction rates to  
241 substrate concentration, and is expressed as:

$$242 \quad v = \frac{d[P]}{dt} = \frac{V_{max}[S]}{K_m + [S]} \quad (2)$$

Beecraft and Rooney. 2020. Bioconcentration of glyphosate in wetland biofilms. PREPRINT. Contact [rrooney@uwaterloo.ca](mailto:rrooney@uwaterloo.ca)

243 Where  $v$  is reaction rate,  $S$  is the substrate (glyphosate in water),  $P$  is the product (glyphosate  
244 adsorbed in biofilm),  $V_{max}$  is the maximum reaction rate achieved by the system, and  $K_m$  is the  
245 Michaelis constant – the substrate concentration at which the reaction rate reaches half of  
246 maximum.

247 Bioconcentration is the retention of a substance in an organism's tissues relative to the  
248 surrounding environment, taken up by contact and respiration (Alexander, 1999; Arnot et al.,  
249 2006). Bioconcentration factor (BCF) was calculated on a dry-weight basis by dividing the  
250 concentration of glyphosate (or AMPA) in the biofilm (dry-weight) by that in the surrounding  
251 water, assuming a steady state had been reached after 24 h of exposure. For field sites where  
252 glyphosate and/or AMPA was detected in biofilm but not in the water, we used the limit of  
253 detection (or quantification) (Supplementary Materials Table S1), as appropriate, for the water  
254 concentration, providing a conservative estimate of the BCF. The dependence of BCF on  
255 ambient water concentrations fit a power function relationship, which we quantified using linear  
256 regression on the log-transformed values. A general linear model of the log-transformed values  
257 was used to assess if the relationship was significantly different based on application type (i.e.  
258 field-exposed vs. lab-dosed) or chemical (glyphosate vs. AMPA) (Supplementary Materials  
259 Table S2). In both cases the factors did not have a significant main or interaction effect and a  
260 single regression was used to model the relationship.

261 We assessed the relationship of AMPA concentration in biofilm or water to glyphosate in  
262 that same substrate by linear regression. Slope was estimated with an intercept estimate and with  
263 the intercept set to zero. We reported regression parameters for the latter for three reasons:  
264 analysis of variance (ANOVA) indicated no significant difference between the linear regression  
265 models with and without intercept estimates; models with an intercept predicted negative AMPA

Beechcraft and Rooney. 2020. Bioconcentration of glyphosate in wetland biofilms. PREPRINT. Contact [rrooney@uwaterloo.ca](mailto:rrooney@uwaterloo.ca)

266 concentrations at low glyphosate concentrations; and an intercept of zero is the logical format  
267 from a biological/chemical perspective. A general linear model was used to confirm that there  
268 was no significant difference in the AMPA-glyphosate relationship between field-exposed and  
269 lab-dosed biofilms (Supplementary Materials Table S3) and so the regression was estimated for  
270 lab-dosed and field-exposed biofilms combined.

271 The effect of glyphosate exposure on the quantum yield of photochemistry,  $\Delta F/F_m'$ , was  
272 assessed by linear regression of the change in  $\Delta F/F_m'$  post-exposure, normalized to initial values  
273 (i.e. (post-exposure – pre-exposure) / pre-exposure). Statistical analyses were performed in Excel  
274 and R Statistical Software version 4.0.1 (R Core Team, 2020), including the packages tidyverse  
275 (Wickham et al., 2019), rstatix (Kassambara, 2020) and broom (Robinson and Hayes, 2020).

### 276 3 Results

277 The uptake of glyphosate from the surrounding water into the biofilm tissues followed a power  
278 function relationship, which we modelled using the Freundlich adsorption isotherm and  
279 Michaelis-Menten enzyme kinetics (Figure 2). Glyphosate and AMPA bioconcentrated in  
280 biofilm tissue by two to three orders of magnitude relative to the surrounding water, with  $BCF_{DW}$   
281 ranging from 11 to 23,500 for glyphosate and from 4 to 3200 for AMPA (

Beechcraft and Rooney. 2020. Bioconcentration of glyphosate in wetland biofilms. PREPRINT. Contact [rrooney@uwaterloo.ca](mailto:rrooney@uwaterloo.ca)

282 Table 1). The  $BCF_{DW}$  of glyphosate and AMPA were strongly dependent on the herbicide  
283 concentration in the ambient water, following a negative power function relationship ( $F_{1,20} =$   
284  $39.62$ ,  $p < 0.0001$ ) (Figure 3). This relationship was not significantly different between lab-dosed  
285 and field-exposed biofilm samples, based on a two-factor general linear model ( $p = 0.903$ ,  
286 Supplementary Materials Table S2).

287 The concentration of AMPA was strongly and significantly dependent on the  
288 concentration of glyphosate in microcosm water (Figure 4a) and biofilm material (Figure 4b),  
289 with much greater regression slopes in the biofilms compared to the filtered lake water (

PREPRINT

Beechcraft and Rooney. 2020. Bioconcentration of glyphosate in wetland biofilms. PREPRINT. Contact [rrooney@uwaterloo.ca](mailto:rrooney@uwaterloo.ca)

290 Table 2). The rate of glyphosate metabolism to AMPA (i.e. regression slope) was not  
291 significantly different between lab-dosed and field-exposed biofilms, based on a two-factor  
292 general linear model ( $p = 0.705$ , Supplementary Materials Table S3).

293 Algal abundance and composition were heterogeneous within the biofilms, based on the  
294 variability in replicate  $\Delta F/F_m'$  measurements taken from each plate and across plates within a  
295 given microcosm (Supplementary Materials Table S4), though pre-exposure  $\Delta F/F_m'$  was not  
296 significantly different between microcosms based on one-way ANOVA ( $F_{4, 166} = 2.307$ ,  $p =$   
297  $0.060$ ). There was a non-significant linear relationship between the normalized change in post-  
298 exposure  $\Delta F/F_m'$  compared to glyphosate exposure concentration ( $y = -0.0068x + 0.0755$ ,  $F_{1,3} =$   
299  $2.628$ ,  $p = 0.2034$ , adjusted  $r^2 = 0.2893$ ; Supplementary Materials Figure S3), suggesting acute  
300 (24 h) exposure at the concentrations tested causes little to no decrease in the efficiency of  
301 photochemistry (Photosystem II activity) of the algal/photosynthetic component of the biofilms.

302



Beecraft and Rooney. 2020. Bioconcentration of glyphosate in wetland biofilms. PREPRINT. Contact [rooney@uwaterloo.ca](mailto:rooney@uwaterloo.ca)

303 Table 1. Dry-weight bioconcentration factors ( $BCF_{DW}$ ) of glyphosate and aminomethyl  
 304 phosphonic acid (AMPA) in biofilms relative to the surrounding water from field-exposed and  
 305 lab-dosed ('lab') biofilms. BDL and BQL indicate herbicide concentrations below  
 306 methodological detection or quantification limit, respectively. In these cases, the limit of  
 307 detection or quantification (LOD/LOQ) in water (Table S1) was used to conservatively estimate  
 308 the BCF, however these samples were not included in calculation of the average BCFs.

| Wetland Site | Glyphosate Treatment | Water            |            | Periphyton          |               | BCF        |      | Average BCF ( $\pm$ SD) |              |
|--------------|----------------------|------------------|------------|---------------------|---------------|------------|------|-------------------------|--------------|
|              |                      | Glyphosate (ppm) | AMPA (ppm) | Glyphosate (ppm dw) | AMPA (ppm dw) | Glyphosate | AMPA | Glyphosate              | AMPA         |
| RPP - 2016   | field-exposed        | 0.068            | 0.016      | 46.0                | 26.0          | 676        | 1625 |                         |              |
| RPP - 2016   | field-exposed        | 0.130            | 0.010      | 52.0                | 15.0          | 400        | 1500 |                         |              |
| RPP - 2016   | field-exposed        | 0.013            | BDL        | 25.0                | 3.2           | 1923       | 3200 |                         |              |
| RPP - 2016   | field-exposed        | 0.094            | 0.011      | 57.0                | 15.0          | 606        | 1364 |                         |              |
| RPP - 2016   | field-exposed        | 0.082            | BQL        | 70.0                | 14.0          | 854        | 1750 |                         |              |
| LPP - 2017   | field-exposed        | 0.019            | BDL        | 25.0                | 3.5           | 1291       | 1750 |                         |              |
| LPP - 2017   | field-exposed        | BDL              | BDL        | 0.5                 | BDL           | 460        | 4    |                         |              |
| LPP - 2017   | field-exposed        | BDL              | BDL        | 0.3                 | BDL           | 290        | 4    | 835 $\pm$ 519           | 1496 $\pm$   |
| LPP - 2017   | field-exposed        | BDL              | BDL        | 23.5                | 3.1           | 23500      | 1550 | (n=11)                  | 131          |
| LPP - 2018   | field-exposed        | 0.0035           | BDL        | 3.4                 | 0.4           | 971        | 210  |                         | (n=3)        |
| LPP - 2018   | field-exposed        | 0.016            | BDL        | 6.9                 | 0.3           | 431        | 125  |                         |              |
| LPP - 2018   | field-exposed        | BDL              | BDL        | 2.5                 | 0.5           | 2500       | 230  |                         |              |
| LPP - 2018   | field-exposed        | 0.03             | BDL        | 9.0                 | 1.5           | 300        | 750  |                         |              |
| LPP - 2018   | field-exposed        | 0.0098           | BDL        | 3.3                 | 0.5           | 337        | 265  |                         |              |
| LPP - 2018   | field-exposed        | BDL              | BDL        | 2.0                 | 0.5           | 2000       | 225  |                         |              |
| LPP - 2018   | field-exposed        | 0.0045           | BDL        | 6.3                 | 1.4           | 1400       | 700  |                         |              |
| RPP - 2018   | lab (0.01 ppm)       | 0.008            | 0.001      | 4.6                 | 0.4           | 613        | 175  |                         |              |
| RPP - 2018   | lab (0.1 ppm)        | 0.074            | 0.008      | 10.0                | 1.1           | 135        | 147  | 199 $\pm$ 281           | 134 $\pm$ 13 |
| RPP - 2018   | lab(1.0 ppm)         | 0.900            | 0.068      | 34.0                | 9.2           | 38         | 135  | (n=4)                   | (n=3)        |
| RPP - 2018   | lab (10 ppm)         | 11.000           | 0.340      | 120.0               | 41.0          | 11         | 121  |                         |              |

309 Note: Average BCF values do not include samples where water concentrations were BDL or BQL to provide a  
 310 conservative estimate of average BCF.

311

Beecraft and Rooney. 2020. Bioconcentration of glyphosate in wetland biofilms. PREPRINT. Contact [rooney@uwaterloo.ca](mailto:rooney@uwaterloo.ca)

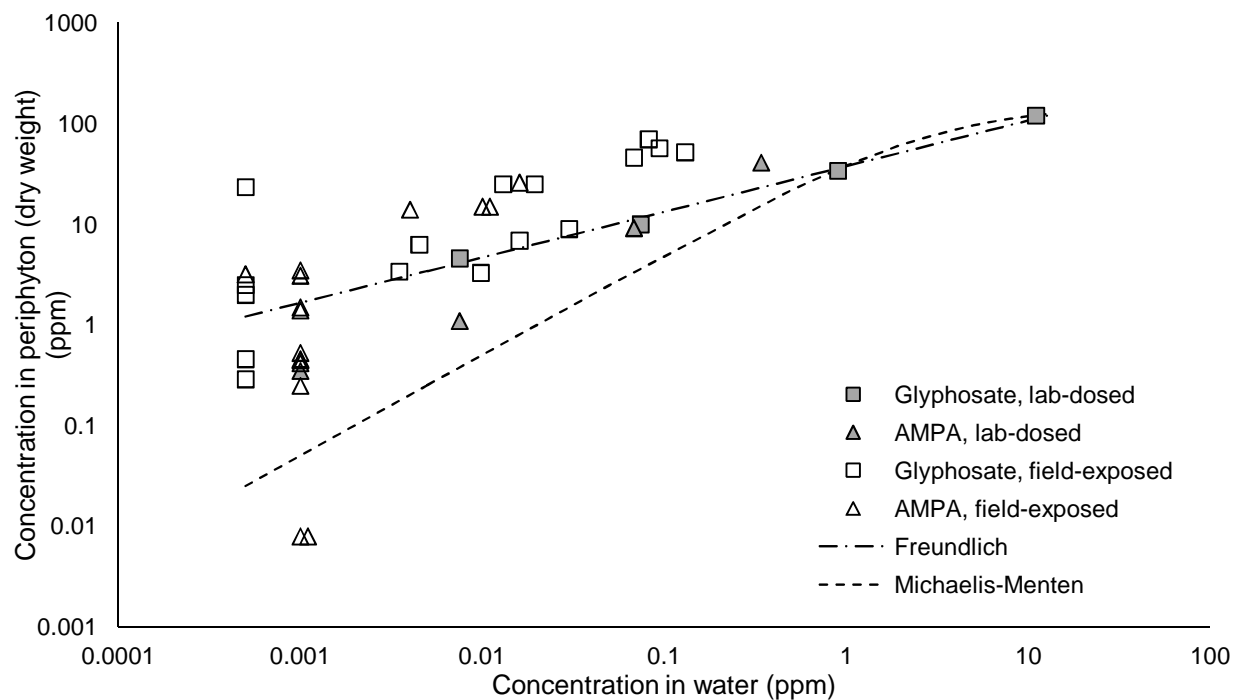

312

313 Figure 2. Glyphosate and AMPA retention in biofilms relative to concentrations in the  
314 surrounding water. Models of glyphosate retention kinetics in biofilm tissues were estimated  
315 from lab-dosed biofilms in microcosm experiments (grey symbols). We used the Freundlich  
316 adsorption isotherm:  $C_s = 37.497C_e^{1/2.21}$  (dashed line) and Michaelis-Menten enzyme kinetics  
317  $(d[P])/dt=(156.056[S])/(3.039+[S])$  (dotted line).

318

Beecraft and Rooney. 2020. Bioconcentration of glyphosate in wetland biofilms. PREPRINT. Contact [rooney@uwaterloo.ca](mailto:rooney@uwaterloo.ca)

319

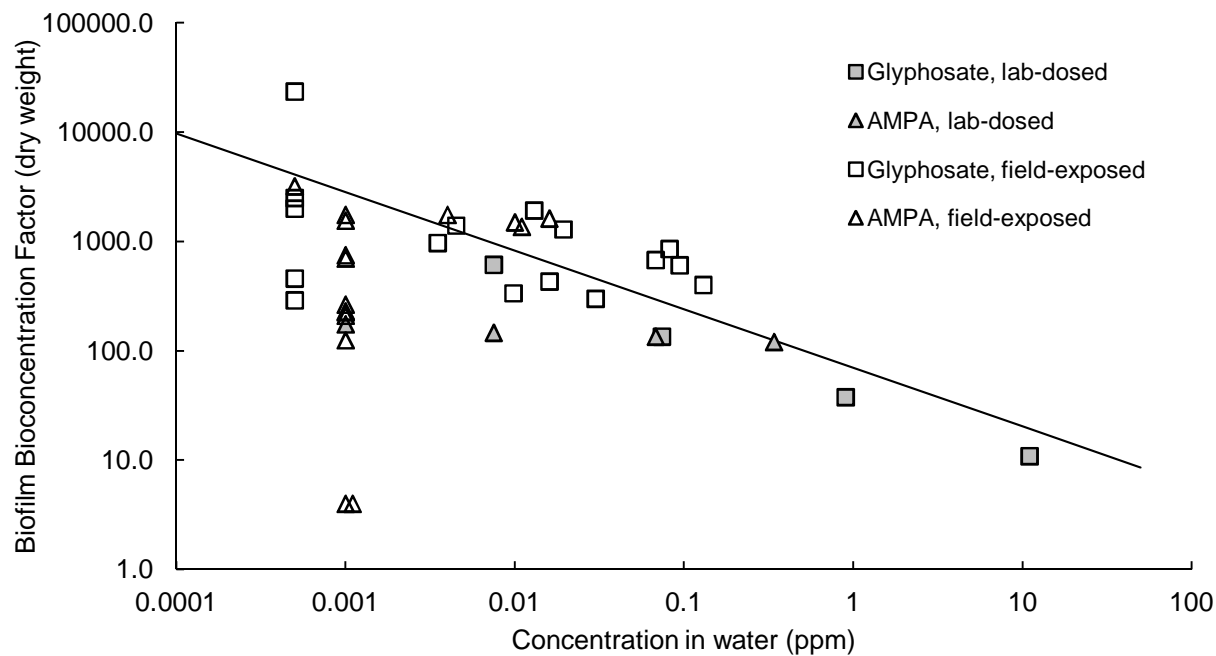

320

321 Figure 3. Dry-weight bioconcentration factors ( $BCF_{DW}$ ) of glyphosate and AMPA in biofilm  
322 tissues from microcosms (lab-dosed) and field-exposed samples vary with ambient water  
323 concentration in a power function relationship:  $y = 69.88 \cdot x^{-0.536}$ , residual standard error =  
324 0.3564,  $F_{1,20} = 39.62$ ,  $p < 0.0001$ .

325

326

327

Beecraft and Rooney. 2020. Bioconcentration of glyphosate in wetland biofilms. PREPRINT. Contact [rrooney@uwaterloo.ca](mailto:rrooney@uwaterloo.ca)

328 Table 2. Linear regression analysis of the AMPA-glyphosate relationship in biofilms and  
 329 microcosm water, including control microcosms containing un-colonized plates, with regression

| Medium                       | Linear regression results |    |        |             |          |                |
|------------------------------|---------------------------|----|--------|-------------|----------|----------------|
|                              | Slope                     | df | RSE    | F-statistic | p-value  | R <sup>2</sup> |
| Biofilm                      | 0.2997                    | 28 | 3.4260 | 240.2       | 2.87E-15 | 0.8919         |
| Water (colonized microcosms) | 0.0312                    | 4  | 0.0202 | 291         | 6.93E-05 | 0.9831         |
| Water (control microcosms)   | 0.0092                    | 2  | 0.0036 | 941.5       | 0.00106  | 0.9968         |

330 parameters including degrees of freedom (df), residual standard error (RSE) and adjusted R<sup>2</sup>.

331

332

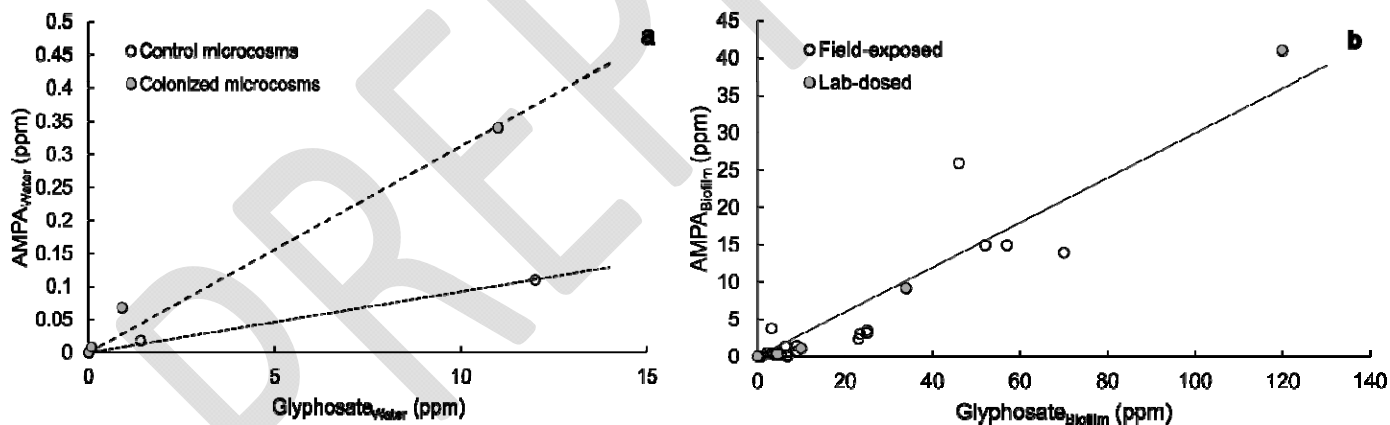

333

334

335 Figure 4. Concentration of the breakdown product, AMPA, increases linearly (

Beecraft and Rooney. 2020. Bioconcentration of glyphosate in wetland biofilms. PREPRINT. Contact [rrooney@uwaterloo.ca](mailto:rrooney@uwaterloo.ca)

336 Table 2) with glyphosate concentration in **(a)** water of control (open symbols) and colonized  
337 (grey symbols) microcosms after 24 h exposure, and in **(b)** biofilm tissues dosed for 24 h under  
338 laboratory conditions ('lab-dosed', grey symbols) and biofilms exposed *in situ* for 24 h – ca. 40  
339 days ('field-exposed', open symbols).

## 340 4 Discussion

341 Biofilms are ecologically important for a number of reasons, including that they adsorb,  
342 retain and amplify solutes, accumulating substances that are otherwise highly dilute in the  
343 surrounding water (Battin et al., 2016; Sabater et al., 2002), with evidence of biofilms  
344 accumulating herbicides (Chaumet et al., 2019; Klátyik et al., 2017; Lawrence et al., 2001;  
345 Nikkila et al., 2001), insecticides (Lundqvist et al., 2012), PCBs (Wang et al., 1999), and a  
346 variety of other pesticides (Mahler et al., 2020; Rooney et al., 2020). Glyphosate is the most  
347 heavily used herbicide globally and is accumulating in our wetlands. Although its direct toxicity  
348 to fauna is well characterized as low risk (e.g. Giesy et al., 2000), there is a growing body of  
349 literature documenting the indirect effects of chronic glyphosate exposure to a wide range of  
350 aquatic organisms (Florencia Gutierrez et al., 2017; Myers et al., 2016; Pizarro et al., 2016; Vera  
351 et al., 2010). Our first objective was to determine if bioconcentration of glyphosate occurs in  
352 wetland biofilms, and test how the bioconcentration factor varies with exposure dose. Our  
353 second objective was to assess whether the glyphosate interacting with wetland biofilms is  
354 available for metabolism and to measure the extent of breakdown of glyphosate to AMPA by  
355 biofilm organisms.

356 We observed retention and bioconcentration of glyphosate and its breakdown product  
357 AMPA in lab-dosed and field-exposed biofilms. The herbicide had strong adsorption at low  
358 ambient concentrations, and an apparent saturation effect at higher ambient concentrations,

Beecraft and Rooney. 2020. Bioconcentration of glyphosate in wetland biofilms. PREPRINT. Contact [rrooney@uwaterloo.ca](mailto:rrooney@uwaterloo.ca)

359 similar to observations of diuron accumulation by Chaumet et al. (2019). This is supported by  
360 the strong fit of both Michaelis-Menten enzyme kinetics and Freundlich adsorption models to  
361 our data. Furthermore, observed BCFs more closely followed the Freundlich adsorption isotherm  
362 at low ambient water concentrations (< 1 ppm) and Michaelis-Menten kinetics at higher  
363 concentrations (> 1 ppm). Biologically, this may correspond to initial, rapid adsorption of  
364 herbicide to biofilm surfaces and the extracellular polymeric substances of the biofilm matrix,  
365 followed by slower enzymatic uptake and metabolism of the herbicide by biofilm  
366 microorganisms. The result is a BCF inversely proportional to glyphosate concentration in the  
367 surrounding water.

368 The BCFs of glyphosate and AMPA in field-exposed biofilms were higher than in lab-  
369 exposed biofilms, likely because the observed herbicide concentrations in the water were lower  
370 in the field compared to the laboratory-dosed microcosms. However, the relationship of BCF to  
371 ambient water concentrations did not differ significantly between field-exposed and lab-dosed  
372 biofilms, or between glyphosate and AMPA, suggesting that the microcosms captured the same  
373 mechanisms important to bioconcentration in the wetlands. Thus, although the levels of  
374 glyphosate and AMPA detected in natural surface waters are typically quite low (e.g., 0.159  $\mu\text{g}$   
375  $\text{glyphosate}\cdot\text{L}^{-1}$  (Glozier et al., 2012); < 0.03  $\mu\text{g}$   $\text{glyphosate}\cdot\text{L}^{-1}$  (Annett et al., 2014; Battaglin et  
376 al., 2014), 0.1-0.3  $\mu\text{g}$   $\text{glyphosate}\cdot\text{L}^{-1}$  (Carles et al., 2019)), the glyphosate concentration in  
377 biofilm tissues may be much higher due to bioconcentration, with BCFs greater than 800 at  
378 concentrations reported to be typical of surface waters.

379 Our results contradict the expectation that glyphosate will not bioaccumulate or  
380 bioconcentrate based on its chemical characteristics of high solubility, low octanol-water  
381 partition coefficient, and ability to be broken down by environmental microorganisms (Breckels

Beecraft and Rooney. 2020. Bioconcentration of glyphosate in wetland biofilms. PREPRINT. Contact rrooney@uwaterloo.ca

382 and Kilgour, 2018; Solomon and Thompson, 2003). On the other hand, bioconcentration in  
383 biofilms offers an explanation for the apparent rapid dissipation of glyphosate from surface  
384 waters (Goldsborough and Brown, 1993); e.g., like us, Klátyik et al. (2017) observed the  
385 accelerated dissipation of glyphosate from river water in microcosms containing biofilms within  
386 24 h of herbicide addition. Glyphosate bioconcentration has been observed in other organisms:  
387 leaf tissues of the aquatic macrophyte *Ludwigia peploides* from surrounding surface waters  
388 (Pérez et al., 2017), and in the oligochaete *Lumbriculus variegatus*, with the uptake/adsorption  
389 relative to water concentration fitting the Freundlich adsorption isotherm (Contardo-Jara et al.,  
390 2009). Glyphosate concentrations in surface water can spike immediately after application and  
391 runoff events, and then drop very rapidly, with concentrations much lower in water collected  
392 only a few hours later (Goldsborough and Beck, 1989; Peruzzo et al., 2008; Robichaud and  
393 Rooney, n.d.). The rapid adsorption and bioconcentration by biofilms may both contribute to this  
394 rapid removal, as well as retain the glyphosate in a given environment or location longer than  
395 was previously realized, by retaining it within the biofilm tissues rather than in the water. It  
396 would be useful to know the rate and extent of depuration of glyphosate and AMPA from  
397 biofilms back into the surrounding water column as herbicide concentrations in the water  
398 decrease, which would inform potential flushing of glyphosate from biofilms after herbicide  
399 exposure.

400         Glyphosate is metabolized by a variety of microorganisms in soil, water and sediment  
401 (Solomon and Thompson, 2003; S. Wang et al., 2016), including organisms that can reside in  
402 biofilms. Furthermore, wetlands have been shown to facilitate biodegradation of glyphosate to  
403 AMPA in runoff, correlated with the presence of resident wetland vegetation (Imfeld et al., 2013;  
404 Liu et al., 2019). The wetland biofilms used in the present study metabolized glyphosate from the

Beecraft and Rooney. 2020. Bioconcentration of glyphosate in wetland biofilms. PREPRINT. Contact rrooney@uwaterloo.ca

405 surrounding water, consistent with observations from other studies (Carles et al., 2019; Klátyik et  
406 al., 2017). The stable structure of a biofilm allows for the formation of a functional community  
407 that is more dense and metabolically efficient compared to planktonic cells (Besemer, 2015).  
408 When comparing the dependence of AMPA concentration to glyphosate concentration in biofilm  
409 and water samples, linear regression slopes were highest for the biofilms themselves, followed  
410 by water from microcosms containing colonized plates, and lowest in water from control  
411 microcosms. This indicates that microorganisms present in both the 100 µm-filtered lake water  
412 and the biofilms are metabolizing glyphosate to AMPA, but that the biofilms are primarily  
413 responsible for glyphosate metabolism and are releasing AMPA into the surrounding water. The  
414 rate of conversion (slope) from glyphosate to AMPA was not significantly different between the  
415 lab-dosed and field-exposed biofilms, and was two orders of magnitude higher within the  
416 biofilms compared to filtered lake water. Thus, we conclude that biofilms increase the rate and  
417 extent of glyphosate metabolism in their environment, as suggested by Lawrence et al., (2001)  
418 and Klátyik et al. (2017). These results offer a possible explanation for the observations of  
419 Imfeld et al. (2013) that transport and degradation of glyphosate in stormwater wetlands are  
420 influenced by the vegetation: increased vegetation may have provided increased surface area for  
421 biofilm colonization, and retention and degradation of the biofilms facilitated the observed  
422 changes in water concentrations.

423         Glyphosate and its breakdown product AMPA are frequently detected in surface waters  
424 of Canadian streams and rivers (e.g. Struger, Stempvoort, and Brown 2015) usually at levels  
425 below the Canadian Water Quality Guideline for the protection of aquatic life (800 µg  
426 glyphosate·L<sup>-1</sup> for chronic exposure, (CCME, 2012)). However, if concentrations in biofilms are  
427 orders of magnitude higher than surface waters, it introduces a dietary exposure route to grazing



Beecraft and Rooney. 2020. Bioconcentration of glyphosate in wetland biofilms. PREPRINT. Contact rrooney@uwaterloo.ca

428 organisms via consumption (Lundqvist et al., 2012). Despite considerable research on organism  
429 sensitivity to glyphosate-based herbicides, there is also disparity in the reported results. Toxicity  
430 responses vary with species, exposure route and duration (Annett et al., 2014), ranging from:  
431 negligible (reviewed in Breckels and Kilgour, 2018)(Breckels and Kilgour, 2018); to moderate  
432 (e.g. cladoceran (Tsui and Chu, 2003); snails (Druart et al., 2017); amphibians (Carvalho et al.,  
433 2018; Druart et al., 2017); fish (Zebra et al., 2018)); to strong negative impacts (e.g., amphibians  
434 (King and Wagner, 2010; Paganelli et al., 2010; Relyea and Jones, 2009)). This apparent  
435 discrepancy over the magnitude of risk that glyphosate poses to aquatic biota remains because  
436 the effects of glyphosate-based herbicides on non-target aquatic organisms differ by dose,  
437 exposure route, timing of exposure and taxon studied (Annett et al., 2014; Reno et al., 2014; Tsui  
438 and Chu, 2003). It is further complicated because the commercially available glyphosate  
439 formulations comprise a proprietary blend of constituents to improve herbicide efficacy (Druart  
440 et al., 2017; Klátyik et al., 2017; Myers et al., 2016). Some studies have attributed the toxicity of  
441 glyphosate-based herbicide formulations to these additives, rather than the glyphosate *per se*  
442 (e.g. Reno et al., 2014; Tsui and Chu, 2003), yet these additives may be challenging to identify  
443 and differ among products, hampering synthesis of the toxicological literature on glyphosate  
444 (reviewed in Annett, Habibi, and Hontela 2014). Thus, the formulation and concentration in acid  
445 equivalents need to be considered in studies assessing risk to aquatic life.

446 Bioconcentration of glyphosate in biofilm tissues may be of particular concern for  
447 microalgal/photosynthetic organisms living in biofilms and consequently exposed to potentially  
448 harmful levels of glyphosate and AMPA, exceeding CCME guidelines, even if levels in the  
449 ambient water appear safe. Microalgae in biofilms are important contributors to shallow water  
450 food webs, oxygen and energy production via photosynthesis, and biogeochemical nutrient

Beecraft and Rooney. 2020. Bioconcentration of glyphosate in wetland biofilms. PREPRINT. Contact rrooney@uwaterloo.ca

451 cycling (Battin et al., 2016). Microalgae and cyanobacteria exhibit variable and species-specific  
452 responses to glyphosate exposure (Choi et al., 2012; Forlani et al., 2008; Lozano et al., 2018;  
453 Smedbol et al., 2017; C. Wang et al., 2016). Cyanobacteria have been found to be tolerant to  
454 glyphosate at concentrations of ca. 0.03 mM (ca. 5 ppm) to >10 mM (ca. 1700 ppm) in some  
455 species, with the ability to metabolize and utilize glyphosate as a phosphorus source (Forlani et  
456 al., 2008; Huntscha et al., 2018; Ilikchyan et al., 2009), and low concentrations (0.1 mM, ca. 17  
457 ppm) stimulating growth of some cyanobacteria (Berman et al., 2020; Drzyzga and Lipok, 2018).  
458 Conversely, cyanobacterial growth and photochemistry were found to be more sensitive to  
459 glyphosate compared to eukaryotic microalgae (Smedbol et al., 2017), with the half-maximal  
460 effective concentration ( $EC_{50}$ ) for growth ca.  $400 \mu\text{g}\cdot\text{L}^{-1}$  (ca. 0.4 ppm), while those for  
461 chlorophytes and a cryptophytes ranged from  $400 - 1000 \mu\text{g}\cdot\text{L}^{-1}$  (0.4 – 1 ppm). Concentrations  
462 producing negative responses were generally higher than the exposure levels within biofilm  
463 tissues observed here. Community responses can be further influenced by the availability of  
464 phosphorus when exposed to glyphosate (Berman et al., 2020; Carles et al., 2019; Huntscha et  
465 al., 2018; C. Wang et al., 2016), and the ability of different taxa to compete for and utilize this  
466 nutrient source may play a role.

467 Variable chlorophyll *a* fluorometry can provide an efficient, non-destructive method to  
468 measure algal responses to herbicide stress based on changes in Photosystem II and  
469 photochemical efficiency in phytoplankton (Choi et al., 2012; Smedbol et al., 2017) and  
470 periphyton (Chaumet et al., 2019; Dorigo and Leboulanger, 2001; Feckler et al., 2018; Tiam et  
471 al., 2015). Negative effects on biofilm photosynthetic efficiency have been observed at  
472 glyphosate concentrations on the order of 3 to >10 ppm (or  $\text{mg}\cdot\text{L}^{-1}$ ), over varying exposure time  
473 periods (Bonnineau et al., 2012; Goldsborough and Brown, 1988; Iummato et al., 2017), yet we

Beecraft and Rooney. 2020. Bioconcentration of glyphosate in wetland biofilms. PREPRINT. Contact rrooney@uwaterloo.ca

474 observed only a weak, non-significant trend of declining  $\Delta F/F_m'$  with glyphosate exposure.  
475 Importantly, average post-exposure  $\Delta F/F_m'$  was  $> 0.6$  for all exposure concentrations, a quantum  
476 yield value typical of healthy algal cells (Campbell et al., 1998; Kolber et al., 1988). Glyphosate  
477 inhibits aromatic amino acid synthesis and does not directly target the photosynthetic apparatus.  
478 Hence, when additional stressors are absent and requirements for new cellular protein are  
479 minimal, it seems reasonable that brief exposures to 1-10 ppm glyphosate would have limited  
480 effects on the photosynthetic efficiency of biofilms. In contrast, maximum quantum yield ( $F_v/F_m$ )  
481 of freshwater phytoplankton was suppressed following glyphosate exposure ( $< 15$  ppm (Choi et  
482 al., 2012); 0.5 – 1 ppm (Smedbol et al., 2017)), with responses following Michaelis-Menten  
483 saturation kinetics (Choi et al., 2012), but also showing considerable species-specific differences  
484 in sensitivity (Smedbol et al., 2017). Quantum yield alone may not be sensitive enough to assess  
485 herbicide stress in periphyton communities over short time scales (Dorigo and Leboulanger,  
486 2001; Tiam et al., 2015), in particular for herbicides that do not directly affect Photosystem II  
487 (Feckler et al., 2018). Our results support this assessment, and we recommend parallel  
488 measurement of different responses over time to effectively capture herbicide effects on algal  
489 physiology and metabolism.

490 The range of response factors and species-specific variability suggests changes in  
491 photosynthetic community structure are likely following glyphosate exposure (Berman et al.,  
492 2020; Huntscha et al., 2018; Klátyik et al., 2017; Lozano et al., 2018; Pizarro et al., 2016;  
493 Smedbol et al., 2018). Changes to algal community composition have been observed at  
494 environmentally relevant concentrations of glyphosate (Magbanua et al., 2013), including  
495 increased abundance of chlorophytes (Klátyik et al., 2017) and cyanobacteria (Berman et al.,  
496 2020; Huntscha et al., 2018; Lozano et al., 2018; Pérez et al., 2007). We expect that chronic

Beechcraft and Rooney. 2020. Bioconcentration of glyphosate in wetland biofilms. PREPRINT. Contact [rrooney@uwaterloo.ca](mailto:rrooney@uwaterloo.ca)

497 exposure to glyphosate may favour taxa with resistant forms of the target enzyme EPSPS or  
498 other tolerance mechanisms (Forlani et al., 2008; Huntscha et al., 2018), as well as those best  
499 able to utilize metabolically released phosphorus (Berman et al., 2020; Forlani et al., 2008; C.  
500 Wang et al., 2016). If changes in community composition negatively influence the health or  
501 abundance of species that are preferentially grazed by other organisms, indirect trophic effects  
502 may result. Increases in the abundance of cyanobacteria and/or planktonic algae may influence  
503 water quality and macrophyte abundance (Berman et al., 2020; Pizarro et al., 2016). This points  
504 to the need for future work examining the effects of chronic exposure on community structure  
505 along with biofilm functional characteristics, including autotrophy vs. heterotrophy (e.g. Feckler  
506 et al., 2018), pigment and lipid content. It would also be valuable to examine any changes in the  
507 relative abundance of type I and type II EPSPS pathways that would reveal a shift from sensitive  
508 to tolerant taxa and possibly an increase in the abundance of species with the C-P lyase necessary  
509 to harvest phosphorus from glyphosate.

#### 510 4.1 Conclusions

511 The results presented reveal the ability of biofilms to metabolize glyphosate and retain  
512 and bioconcentrate glyphosate and its breakdown product AMPA. This demonstrates the  
513 importance of biofilms to improving water quality, facilitating contaminant removal from surface  
514 water and runoff – a valuable ecosystem function provided by wetlands and facilitated by  
515 biofilms. This is a potential explanation for the observed rapid dissipation of glyphosate from  
516 surface waters and the low levels detected even a short time after runoff events (Goldsborough  
517 and Beck, 1989; Goldsborough and Brown, 1993; Imfeld et al., 2013; Peruzzo et al., 2008).  
518 However, these same features present a potential negative impact, as biofilms also provide  
519 habitat and a food source for many invertebrates and juvenile aquatic organisms, including fish

Beecraft and Rooney. 2020. Bioconcentration of glyphosate in wetland biofilms. PREPRINT. Contact rrooney@uwaterloo.ca

520 and amphibians (Battin et al., 2016). Bioconcentration of glyphosate and other pesticides in  
521 biofilms presents a contaminant delivery route to higher trophic levels that is not well understood  
522 (Lundqvist et al., 2012). The majority of ecotoxicological risk assessments examine  
523 physiological effects resulting from immersion, and we may be under-recognizing the potential  
524 ecological risk of contaminants, like glyphosate, that are bioconcentrating in biofilms and  
525 subsequently being consumed. Risk assessments for contaminants need to consider both the  
526 toxicity as well as the different exposure routes to organisms, and future ecotoxicity research  
527 should incorporate the effects of acute and chronic dietary exposure of glyphosate, as well as  
528 other contaminants, to aquatic biota.

529

## 530 **5 Acknowledgements**

531 Funding: This work was funded by research agreement NCA\_20180507152929575 from the Ontario  
532 Ministry of Natural Resources and Forestry, National Science and Engineering Research Council of  
533 Canada Discovery Grant RGPIN-03846, and the Mitacs Career Connect program.

534 Field and laboratory assistance was provided by G. Howell, D. Anderson, H. Polowyk, S. Yuckin, H.  
535 Quinn-Austin, J. Pearson, L. Koiter, M. Tanguay and C. Robichaud. We thank      anonymous reviewers  
536 for their feedback that improved this manuscript.

## 537 **6 References**

538 (WHO), W.H.O., 2005. Glyphosate and AMPA in Drinking-Water.

539 Alexander, D.E., 1999. Bioaccumulation, bioconcentration, biomagnification, in: Environmental  
540 Geology. Springer Netherlands, Dordrecht, pp. 43–44. [https://doi.org/10.1007/1-4020-4494-1\\_31](https://doi.org/10.1007/1-4020-4494-1_31)

541 Alister, C.A., Araya, M.A., Kogan, M., 2010. Adsorption and desorption variability of four herbicides

Beecraft and Rooney. 2020. Bioconcentration of glyphosate in wetland biofilms. PREPRINT. Contact [rrooney@uwaterloo.ca](mailto:rrooney@uwaterloo.ca)

- 542 used in paddy rice production. *J. Environ. Sci. Heal. Part B* 46, 62–68.
- 543 <https://doi.org/10.1080/03601234.2011.534372>
- 544 Amrhein, N., Deus, B., Gehrke, P., Steinrucken, H.C., 1980. The Site of the Inhibition of the Shikimate  
545 Pathway by Glyphosate. II. Interference of Glypyhosate with Chorismate formation in vivo and in  
546 vitro. *Plant Physiol* 66, 830–834.
- 547 Annett, R., Habibi, H.R., Hontela, A., 2014. Impact of glyphosate and glyphosate-based herbicides on the  
548 freshwater environment. *J. Appl. Toxicol.* 34, 458–479. <https://doi.org/10.1002/jat.2997>
- 549 Arnot, J.A., APC Gobas, F., Gobas, F., 2006. A review of bioconcentration factor (BCF) and  
550 bioaccumulation factor (BAF) assessments for organic chemicals in aquatic organisms. *Environ.*  
551 *Rev* 14, 257–297. <https://doi.org/10.1139/A06-005>
- 552 Battaglin, W.A., Meyer, M.T., Kuivila, K.M., Dietze, J.E., 2014. Glyphosate and its degradation product  
553 AMPA occur frequently and widely in U.S. soils, surface water, groundwater, and precipitation. *J.*  
554 *Am. Water Resour. Assoc.* 50, 275–290. <https://doi.org/10.1111/jawr.12159>
- 555 Battin, T.J., Besemer, K., Bengtsson, M.M., Romani, A.M., Packmann, A.I., 2016. The ecology and  
556 biogeochemistry of stream biofilms. *Nat Rev Microbiol* 14, 251–263.  
557 <https://doi.org/10.1038/nrmicro.2016.15>
- 558 Benbrook, C.M., 2016. Trends in glyphosate herbicide use in the United States and globally. *Environ. Sci.*  
559 *Eur.* 28, 3. <https://doi.org/10.1186/s12302-016-0070-0>
- 560 Berman, M.C., Llamas, M.E., Minotti, P., Fermani, P., Quiroga, M. V., Ferraro, M.A., Metz, S., Zagarese,  
561 H.E., 2020. Field evidence supports former experimental claims on the stimulatory effect of  
562 glyphosate on picocyanobacteria communities. *Sci. Total Environ.* 701, 134601.  
563 <https://doi.org/10.1016/j.scitotenv.2019.134601>
- 564 Besemer, K., 2015. Biodiversity, community structure and function of biofilms in stream ecosystems.

Beecraft and Rooney. 2020. Bioconcentration of glyphosate in wetland biofilms. PREPRINT. Contact [rrooney@uwaterloo.ca](mailto:rrooney@uwaterloo.ca)

- 565 Res. Microbiol. 166, 774–781. <https://doi.org/10.1016/j.resmic.2015.05.006>
- 566 Bonnineau, C., Sague, I.G., Urrea, G., Guasch, H., 2012. Light history modulates antioxidant and  
567 photosynthetic responses of biofilms to both natural (light) and chemical (herbicides) stressors.  
568 Ecotoxicology 21, 1208–1224. <https://doi.org/10.1007/s10646-012-0876-5>
- 569 Breckels, R., Kilgour, B., 2018. Aquatic herbicide applications for the control of aquatic plants in Canada:  
570 effects to nontarget aquatic organisms. Environ. Rev. 26, 333–338. [https://doi.org/10.1139/er-2018-](https://doi.org/10.1139/er-2018-0002)  
571 0002
- 572 Campbell, D., Hurry, V., Clarke, A.K., Gustafsson, P., Öquist, G., 1998. Chlorophyll Fluorescence  
573 Analysis of Cyanobacterial Photosynthesis and Acclimation. Microbiol. Mol. Biol. Rev. 62, 667–  
574 683. <https://doi.org/10.1128/membr.62.3.667-683.1998>
- 575 Carles, L., Gardon, H., Joseph, L., Sanchís, J., Farré, M., Artigas, J., 2019. Meta-analysis of glyphosate  
576 contamination in surface waters and dissipation by biofilms. Environ. Int. 124, 284–293.  
577 <https://doi.org/10.1016/j.envint.2018.12.064>
- 578 Carvalho, W.F., Franco, F.C., Godoy, F.R., Folador, D., Avelar, J.B., Nomura, F., da Cruz, A.D., de  
579 Sabóia-Morais, S.M.T., Bastos, R.P., e Silva, D. de M., 2018. Evaluation of Genotoxic and  
580 Mutagenic Effects of Glyphosate Roundup Original® in *Dendropsophus minutus* Peters, 1872  
581 Tadpoles. South Am. J. Herpetol. 13, 220–229. <https://doi.org/10.2994/SAJH-D-17-00016.1>
- 582 CCME, (Canadian Council of Ministers of the Environment), 2012. Canadian water quality guidelines for  
583 the protection of aquatic life: glyphosate, in: Canadian Environmental Quality Guidelines. CCME,  
584 Winnipeg, Canada.
- 585 Chaumet, B., Morin, S., Hourtané, O., Artigas, J., Delest, B., Eon, M., Mazzella, N., 2019. Flow  
586 conditions influence diuron toxicokinetics and toxicodynamics in freshwater biofilms. Sci. Total  
587 Environ. 652, 1242–1251. <https://doi.org/10.1016/j.scitotenv.2018.10.265>

Beecraft and Rooney. 2020. Bioconcentration of glyphosate in wetland biofilms. PREPRINT. Contact [rrooney@uwaterloo.ca](mailto:rrooney@uwaterloo.ca)

- 588 Choi, C.J., Berges, J.A., Young, E.B., 2012. Rapid effects of diverse toxic water pollutants on chlorophyll  
589 a fluorescence: Variable responses among freshwater microalgae. *Water Res.* 46, 2615–2626.  
590 <https://doi.org/10.1016/J.WATRES.2012.02.027>
- 591 Contardo-Jara, V., Klingelmann, E., Wiegand, C., 2009. Bioaccumulation of glyphosate and its  
592 formulation Roundup Ultra in *Lumbriculus variegatus* and its effects on biotransformation and  
593 antioxidant enzymes. *Environ. Pollut.* 157, 57–63. <https://doi.org/10.1016/j.envpol.2008.07.027>
- 594 Cosgrove, J., Borowitzka, Michael A, 2010. Chlorophyll a Fluorescence in Aquatic Sciences: Methods  
595 and Applications, in: Sugget, D.J., Prasil, O., Borowitzka, M.A. (Eds.), *Chlorophyll a Fluorescence*  
596 *in Aquatic Sciences: Methods and Applications*. Springer, New York, pp. 1–18.  
597 <https://doi.org/10.1007/978-90-481-9268-7>
- 598 Cui, Y., Jin, L., Ko, S.-R., Chun, S.-J., Oh, H.-S., Lee, C.S., Srivastava, A., Oh, H.-M., Ahn, C.-Y., 2017.  
599 Periphyton effects on bacterial assemblages and harmful cyanobacterial blooms in a eutrophic  
600 freshwater lake: a mesocosm study. *Sci. Rep.* 7, 7827. <https://doi.org/10.1038/s41598-017-08083-x>
- 601 Dorigo, U., Leboulanger, C., 2001. A pulse-amplitude modulated fluorescence-based method for  
602 assessing the effects of photosystem II herbicides on freshwater periphyton. *J. Appl. Phycol.* 13,  
603 509–515.
- 604 Druart, C., Gimbert, F., Scheifler, R., de Vauflery, A., 2017. A full life-cycle bioassay with *Cantareus*  
605 *aspersus* shows reproductive effects of a glyphosate-based herbicide suggesting potential endocrine  
606 disruption. *Environ. Pollut.* 226, 240–249. <https://doi.org/10.1016/j.envpol.2017.03.061>
- 607 Drzyzga, D., Lipok, J., 2018. Glyphosate dose modulates the uptake of inorganic phosphate by freshwater  
608 cyanobacteria. *J. Appl. Phycol.* 30, 299–309. <https://doi.org/10.1007/s10811-017-1231-2/Published>
- 609 Duke, S.O., Powles, S.B., 2008. Glyphosate: a once-in-a-century herbicide. *Pest Manag. Sci.* 63, 1100–  
610 1106. <https://doi.org/10.1002/ps>



Beecraft and Rooney. 2020. Bioconcentration of glyphosate in wetland biofilms. PREPRINT. Contact [rrooney@uwaterloo.ca](mailto:rrooney@uwaterloo.ca)

- 611 Feckler, A., Rakovic, J., Kahlert, M., Tröger, R., Bundschuh, M., 2018. Blinded by the light: Increased  
612 chlorophyll fluorescence of herbicide-exposed periphyton masks unfavorable structural responses  
613 during exposure and recovery. *Aquat. Toxicol.* 203, 187–193.  
614 <https://doi.org/10.1016/j.aquatox.2018.08.015>
- 615 Fernandes, G., Aparicio, V.C., Camotti Bastos, M., De Gerónimo, E., Labanowski, J., Prestes, D.,  
616 Zanella, R., Rheinheimer, D., Santos, D., 2019. Indiscriminate use of glyphosate impregnates river  
617 epilithic biofilms in southern Brazil. *Sci. Total Environ.* 651, 1377–1387.  
618 <https://doi.org/10.1016/j.scitotenv.2018.09.292>
- 619 Florencia Gutierrez, M., Battauz, Y., En Caisso, B., 2017. Disruption of the hatching dynamics of  
620 zooplankton egg banks due to glyphosate application. *Chemosphere* 171, 644–653.  
621 <https://doi.org/10.1016/j.chemosphere.2016.12.110>
- 622 Forlani, G., Pavan, M., Gramek, M., Kafarski, P., Lipok, J., 2008. Biochemical Bases for a Widespread  
623 Tolerance of Cyanobacteria to the Phosphonate Herbicide Glyphosate. *Plant Cell Physiol.* 49, 443–  
624 456. <https://doi.org/10.1093/pcp/pcn021>
- 625 Giesy, J., Dobson, S., Solomon, K., 2000. Ecotoxicological risk assessment for Roundup (R) Herbicide.  
626 *Rev. Environ. Contam. Toxicol.* 167, 35–120.
- 627 Glozier, Nancy E, Struger, John, Cessna, Allan J, Gledhill, Melissa, Rondeau, Myriam, Ernst, William R,  
628 Sekela, Mark A, Cagampan, Steve J, Sverko, Ed, Murphy, C., Murray, Janine L, Donald, David B,  
629 Glozier, N E, Struger, J, Cagampan, S J, Sverko, E, Cessna, A J, Gledhill, M, Sekela, M A,  
630 Rondeau, M, Ernst, W R, Murphy, : C, Murray, J L, Donald, D B, 2012. Occurrence of glyphosate  
631 and acidic herbicides in select urban rivers and streams in Canada, 2007. *Env. Sci Pollut Res* 19,  
632 821–834. <https://doi.org/10.1007/s11356-011-0600-7>
- 633 Goldsborough, L.G., Beck, A.E., 1989. Rapid dissipation of glyphosate in small forest ponds. *Arch.*  
634 *Environm. Contain. Toxicol* 18, 537–544.

Beecraft and Rooney. 2020. Bioconcentration of glyphosate in wetland biofilms. PREPRINT. Contact [rr Rooney@uwaterloo.ca](mailto:rr Rooney@uwaterloo.ca)

- 635 Goldsborough, L.G., Brown, D.J., 1993. Phosphonate and AMPA dissipation in acid water and  
636 sediments.pdf. *Environ. Toxicol. Chem.* 12, 1139–1147.
- 637 Goldsborough, L.G., Brown, D.J., 1988. Effect of glyphosate (Roundup® formulation) on periphytic  
638 algal photosynthesis. *Bull. Environ. Contam. Toxicol.* 41, 253–260.  
639 <https://doi.org/10.1007/BF01705439>
- 640 Hébert, M.P., Fugère, V., Gonzalez, A., 2019. The overlooked impact of rising glyphosate use on  
641 phosphorus loading in agricultural watersheds. *Front. Ecol. Environ.* 17, 48–56.  
642 <https://doi.org/10.1002/fee.1985>
- 643 Henderson, A.M., Gervais, J.A., Luukinen, B., Buhl, K., Stone, D., 2010. Glyphosate Technical Fact  
644 Sheet.
- 645 Hiriart-Baer, V.P., Arciszewski, T.J., Malkin, S.Y., Guildford, S.J., Hecky, R.E., 2008. Use of pulse-  
646 amplitude-modulated fluorescence to assess the physiological status of *Cladophora* sp. along a water  
647 quality gradient. *J. Phycol.* 44, 1604–1613. <https://doi.org/10.1111/j.1529-8817.2008.00588.x>
- 648 Huntscha, S., Stravs, M.A., Bu□, A., Ahrens, C.H., Ju□, ||, Frey, E., Pomati, F., Hollender, J., Buerge,  
649 I.J., Balmer, M.E., Poiger, T., 2018. Seasonal Dynamics of Glyphosate and AMPA in Lake  
650 Greifensee: Rapid Microbial Degradation in the Epilimnion During Summer. *Environ. Sci. Technol.*  
651 52, 4641–4649. <https://doi.org/10.1021/acs.est.8b00314>
- 652 Ilikchyan, I.N., McKay, R.M.L., Zehr, J.P., Dyhrman, S.T., Bullerjahn, G.S., 2009. Detection and  
653 expression of the phosphonate transporter gene *phnD* in marine and freshwater picocyanobacteria.  
654 *Environ. Microbiol.* 11, 1314–1324. <https://doi.org/10.1111/j.1462-2920.2009.01869.x>
- 655 Imfeld, G., Lefrancq, M., Maillard, E., Payraudeau, S., 2013. Transport and attenuation of dissolved  
656 glyphosate and AMPA in a stormwater wetland. *Chemosphere* 90, 1333–1339.  
657 <https://doi.org/10.1016/j.chemosphere.2012.04.054>

Beecraft and Rooney. 2020. Bioconcentration of glyphosate in wetland biofilms. PREPRINT. Contact [rooney@uwaterloo.ca](mailto:rooney@uwaterloo.ca)

- 658 Iummato, M.M., Pizarro, H., Cataldo, D., Di Fiori, E., dos Santos Afonso, M., del Carmen Ríos de  
659 Molina, M., Juárez, Á.B., 2017. Effect of glyphosate acid on biochemical markers of periphyton  
660 exposed in outdoor mesocosms in the presence and absence of the mussel *Limnoperna fortunei*.  
661 *Environ. Toxicol. Chem.* 36, 1775–1784. <https://doi.org/10.1002/etc.3820>
- 662 Janßen, R., Skeff, W., Werner, J., Wirth, M.A., Kreikemeyer, B., Schulz-bull, D., Labrenz, M., 2019. A  
663 Glyphosate Pulse to Brackish Long-Term Microcosms Has a Greater Impact on the Microbial  
664 Diversity and Abundance of Planktonic Than of Biofilm Assemblages. *Front. Mar. Sci.* 6, 1–17.  
665 <https://doi.org/10.3389/fmars.2019.00758>
- 666 Kassambara, A., 2020. rstatix: Pipe-Friendly Framework for Basic Statistical Tests.
- 667 King, J.J., Wagner, R.S., 2010. Toxic Effects of the Herbicide Roundup® Regular on Pacific  
668 Northwestern Amphibians. *Northwest. Nat.* 91, 318–324. <https://doi.org/10.1898/NWN09-25.1>
- 669 Kish, P.A., 2006. Evaluation of Herbicide Impact on Periphyton Community Structure Using the Matlock  
670 Periphytometer. *J. Freshw. Ecol.* 21, 341–348. <https://doi.org/10.1080/02705060.2006.9665004>
- 671 Klátyik, S., Takács, E., Mörtl, M., Földi, A., Trábert, Z., Ács, É., Darvas, B., Székács, A., 2017.  
672 Dissipation of the herbicide active ingredient glyphosate in natural water samples in the presence of  
673 biofilms. *Int. J. Environ. Anal. Chem.* 97, 901–921. <https://doi.org/10.1080/03067319.2017.1373770>
- 674 Kolber, Z., Zehr, J., Falkowski, P., 1988. Effects of growth irradiance and nitrogen limitation on  
675 photosynthetic energy-conversion in photosystem-II. *Plant Physiol* 88, 923–929.  
676 <https://doi.org/10.1104/pp.88.3.923>
- 677 Lawrence, J.R., Kopf, G., Headley, J. V, Neu, T.R., 2001. Sorption and metabolism of selected herbicides  
678 in river biofilm communities. *Can J Microbiol* 47, 634–641. <https://doi.org/10.1139/cjm-47-7-634>
- 679 Liu, T., Xu, S., Lu, Shaoyong, Qin, P., Ding, H., Liu, Y., Guo, X., Liu, X., Lu, S, 2019. A review on  
680 removal of organophosphorus pesticides in constructed wetland: Performance, mechanism and

Beecraft and Rooney. 2020. Bioconcentration of glyphosate in wetland biofilms. PREPRINT. Contact [rr Rooney@uwaterloo.ca](mailto:rr Rooney@uwaterloo.ca)

- 681 influencing factors. *Sci. Total Environ.* 651, 2247–2268.
- 682 <https://doi.org/10.1016/j.scitotenv.2018.10.087>
- 683 Lozano, V., Vinocur, A., Sabio García, C., Allende, L., Cristos, D., Rojas, D., Wolansky, M., Pizarro, H.,
- 684 2018. Effects of glyphosate and 2,4-D mixture on freshwater phytoplankton and periphyton
- 685 communities: a microcosms approach. *Ecotoxicol. Environ. Saf.* 148, 1010–1019.
- 686 <https://doi.org/10.1016/j.ecoenv.2017.12.006>
- 687 Lundqvist, A., Bertilsson, S., Goedkoop, W., 2012. Interactions with DOM and biofilms affect the fate
- 688 and bioavailability of insecticides to invertebrate grazers. *Ecotoxicology* 21, 2398–2408.
- 689 <https://doi.org/10.1007/s10646-012-0995-z>
- 690 Lupi, L., Bedmar, F., Puricelli, M., An Marino, D., Aparicio, V.C., Wunderlin, D., Miglioranza, K.S.B.,
- 691 2019. Glyphosate runoff and its occurrence in rainwater and subsurface soil in the nearby area of
- 692 agricultural fields in Argentina. <https://doi.org/10.1016/j.chemosphere.2019.03.090>
- 693 Magbanua, F.S., Townsend, C.R., Hageman, K.J., Lange, K., Lear, G., Lewis, G.D., Matthaei, C.D.,
- 694 2013. Understanding the combined influence of fine sediment and glyphosate herbicide on stream
- 695 periphyton communities. *Water Res.* 47, 5110–5120. <https://doi.org/10.1016/j.watres.2013.05.046>
- 696 Mahler, B.J., Schmidt, T.S., Nowell, L.H., Qi, S.L., Van Metre, P.C., Hladik, M.L., Carlisle, D.M., Munn,
- 697 M.D., May, J., 2020. Biofilms Provide New Insight into Pesticide Occurrence in Streams and Links
- 698 to Aquatic Ecological Communities. *Environ. Sci. Technol* 54, 5509–5519.
- 699 <https://doi.org/10.1021/acs.est.9b07430>
- 700 Majewski, M.S., Coupe, R.H., Foreman, W.T., Capel, P.D., 2014. Pesticides in Mississippi air and rain: A
- 701 comparison between 1995 and 2007. *Environ. Toxicol. Chem.* 33, 1283–1293.
- 702 <https://doi.org/10.1002/etc.2550>
- 703 Medalie, L., Baker, N.T., Shoda, M.E., Stone, W.W., Meyer, M.T., Stets, E.G., Wilson, M., 2020.

Beecraft and Rooney. 2020. Bioconcentration of glyphosate in wetland biofilms. PREPRINT. Contact [rrooney@uwaterloo.ca](mailto:rrooney@uwaterloo.ca)

- 704 Influence of land use and region on glyphosate and aminomethylphosphonic acid in streams in the  
705 USA. *Sci. Total Environ.* 707, 136008. <https://doi.org/10.1016/j.scitotenv.2019.136008>
- 706 Montiel-León, J.M., Munoz, G., Vo Duy, S., Do, D.T., Vaudreuil, M.A., Goeury, K., Guillemette, F.,  
707 Amyot, M., Sauvé, S., 2019. Widespread occurrence and spatial distribution of glyphosate, atrazine,  
708 and neonicotinoids pesticides in the St. Lawrence and tributary rivers. *Environ. Pollut.* 250, 29–39.  
709 <https://doi.org/10.1016/j.envpol.2019.03.125>
- 710 Myers, J.P., Antoniou, M.N., Blumberg, B., Carroll, L., Colborn, T., Everett, L.G., Hansen, M.,  
711 Landrigan, P.J., Lanphear, B.P., Mesnage, R., Vandenberg, L.N., Vom Saal, F.S., Welshons, W. V.,  
712 Benbrook, C.M., 2016. Concerns over use of glyphosate-based herbicides and risks associated with  
713 exposures: a consensus statement. *Environ. Heal.* 15. <https://doi.org/10.1186/s12940-016-0117-0>
- 714 Nikkila, A., Paulsson, M., Almgren, K., Blanck, H., Kukkonen, J.V., 2001. Atrazine Uptake ,  
715 Elimination , and Bioconcentration By Periphyton Communities and *Daphnia Magna*: Effects of  
716 Dissolved Organic Carbon. *Environ. Toxicol. Chem.* 20, 1003–1011.
- 717 Paganelli, A., Gnazzo, V., Acosta, H., López, S.L., Carrasco, A.E., 2010. Glyphosate-Based Herbicides  
718 Produce Teratogenic Effects on Vertebrates by Impairing Retinoic Acid Signaling. *Chem Res*  
719 *Toxicol* 23, 1586–1595. <https://doi.org/10.1021/tx1001749>
- 720 Pérez, D.J., Okada, E., Menone, M.L., Costa, J.L., 2017. Can an aquatic macrophyte bioaccumulate  
721 glyphosate? Development of a new method of glyphosate extraction in *Ludwigia peploides* and  
722 watershed scale validation. *Chemosphere* 185, 975–982.  
723 <https://doi.org/10.1016/j.chemosphere.2017.07.093>
- 724 Pérez, G.L., Torremorell, A., Mugni, H., Rodríguez, P., Vera, M.S., Do Nascimento, M., Allende, L.,  
725 Bustingorry, J., Escaray, R., Ferraro, M., Izaguirre, I., Pizarro, H., Bonetto, C., Morris, D.P.,  
726 Zagarese, H., Perez, G.L., Rodriguez, P., Do Na, M., Allende, L., Donald, C., Morris, P.,  
727 Zagarese, H., 2007. Effects of the Herbicide Roundup on Freshwater Microbial Communities: A

Beecraft and Rooney. 2020. Bioconcentration of glyphosate in wetland biofilms. PREPRINT. Contact [rrooney@uwaterloo.ca](mailto:rrooney@uwaterloo.ca)

- 728 Mesocosm Study. *Ecol. Appl.* 17, 2310–2322.
- 729 Peruzzo, P.J., Porta, A.A., Ronco, A.E., 2008. Levels of glyphosate in surface waters, sediments and soils  
730 associated with direct sowing soybean cultivation in north pampasic region of Argentina. *Environ.*  
731 *Pollut.* <https://doi.org/10.1016/j.envpol.2008.01.015>
- 732 Pizarro, H., Vera, M.S., Vinocur, & A., Pérez, G.L., Ferraro, & M., Menéndez Helman, R.J., Dos, & M.,  
733 Afonso, S., 2016. Glyphosate input modifies microbial community structure in clear and turbid  
734 freshwater systems. *Environ. Sci. Pollut. Res.* 23, 5143–5153. [https://doi.org/10.1007/s11356-015-](https://doi.org/10.1007/s11356-015-5748-0)  
735 [5748-0](https://doi.org/10.1007/s11356-015-5748-0)
- 736 R Core Team, 2020. R: A language and environment for statistical computing.
- 737 Relyea, R.A., Jones, D.K., 2009. the Toxicity of Roundup Original Max® To 13 Species of Larval  
738 Amphibians. *Environ. Toxicol. Chem.* 28, 2004. <https://doi.org/10.1897/09-021.1>
- 739 Reno, U., Gutierrez, M.F., Regalado, L., Gagneten, A.M., 2014. The Impact of Eskoba®, a Glyphosate  
740 Formulation, on the Freshwater Plankton Community. *Water Environ. Res.* 86, 2294–2300.  
741 <https://doi.org/10.2175/106143014X13896437493580>
- 742 Robichaud, C.D., Rooney, R.C., n.d. Glyphosate used to control invasive *Phragmites australis* in standing  
743 water poses little risk to aquatic biota. *Water Res.* #WR56730, Submitted 21 June 2020.
- 744 Robinson, D., Hayes, A., 2020. broom: Convert StatisticalAnalysis Objects into Tidy Tibbles.
- 745 Rooney, R.C., Davy, C., Gilbert, J., Prosser, R., Robichaud, C., Sheedy, C., 2020. Periphyton  
746 bioconcentrates pesticides downstream of catchment dominated by agricultural land use. *Sci. Total*  
747 *Environ.* 702, 134472. <https://doi.org/10.1016/j.scitotenv.2019.134472>
- 748 Sabater, S., Guasch, H., Romaní, A., Muñoz, I., 2002. The effect of biological factors on the efficiency of  
749 river biofilms in improving water quality. *Hydrobiologia* 469, 149–156.

Beecraft and Rooney. 2020. Bioconcentration of glyphosate in wetland biofilms. PREPRINT. Contact [rrooney@uwaterloo.ca](mailto:rrooney@uwaterloo.ca)

- 750 Siemering, G.S., Hayworth, J.D., Greenfield, B.K., 2008. Assessment of Potential Aquatic Herbicide  
751 Impacts to California Aquatic Ecosystems. *Arch Env. Contam Toxicol* 55, 415–431.  
752 <https://doi.org/10.1007/s00244-008-9137-2>
- 753 Silva, V., Montanarella, L., Jones, A., Fernández-Ugalde, O., Mol, H.G.J., Ritsema, C.J., Geissen, V.,  
754 2018. Distribution of glyphosate and aminomethylphosphonic acid (AMPA) in agricultural topsoils  
755 of the European Union. *Sci. Total Environ.* 621, 1352–1359.  
756 <https://doi.org/10.1016/j.scitotenv.2017.10.093>
- 757 Smedbol, É., Gomes, M.P., Paquet, S., Labrecque, M., Lepage, L., Lucotte, M., Juneau, P., 2018. Effects  
758 of low concentrations of glyphosate-based herbicide factor 540 ® on an agricultural stream  
759 freshwater phytoplankton community. *Chemosphere* 192, 133–141.  
760 <https://doi.org/10.1016/j.chemosphere.2017.10.128>
- 761 Smedbol, É., Lucotte, M., Labrecque, M., Lepage, L., Juneau, P., 2017. Phytoplankton growth and PSII  
762 efficiency sensitivity to a glyphosate-based herbicide (Factor 540®). *Aquat. Toxicol.* 192, 265–273.  
763 <https://doi.org/10.1016/J.AQUATOX.2017.09.021>
- 764 Solomon, K., Thompson, D., 2003. Ecological Risk Assessment for Aquatic Organisms from Over-Water  
765 Uses of Glyphosate. *J. Toxicol. Environ. Health* 6, 289–324.  
766 <https://doi.org/10.1080/10937400306468>
- 767 Starcevic, A., Akthar, S., Dunlap, W.C., Shick, J.M., Hranueli, D., Cullum, J., Long, P.F., 2008. Enzymes  
768 of the shikimic acid pathway encoded in the genome of a basal metazoan, *Nematostella vectensis*,  
769 have microbial origins. *PNAS Proc. Natl. Acad. Sci. United States Am.* 105, 2533–2537.
- 770 Struger, J., Stempvoort, D.R. Van, Brown, S.J., 2015. Sources of aminomethylphosphonic acid (AMPA)  
771 in urban and rural catchments in Ontario, Canada: Glyphosate or phosphonates in wastewater?  
772 *Environ. Pollut.* 204, 289–297. <https://doi.org/10.1016/j.envpol.2015.03.038>

Beecraft and Rooney. 2020. Bioconcentration of glyphosate in wetland biofilms. PREPRINT. Contact [rrooney@uwaterloo.ca](mailto:rrooney@uwaterloo.ca)

- 773 Sutherland, I.W., 2001. Biofilm exopolysaccharides: a strong and sticky framework. *Microbiology* 147,  
774 3–9.
- 775 Sviridov, A. V., Shushkova, T. V., Ermakova, I.T., Ivanova, E. V., Epiktetov, D.O., Leontievsky, A.A.,  
776 2015. Microbial degradation of glyphosate herbicides (Review). *Appl. Biochem. Microbiol.* 51,  
777 188–195. <https://doi.org/10.1134/S0003683815020209>
- 778 Tiam, S.K., Laviale, M., Feurtet-Mazel, A., Jan, G., Gonzalez, P., Mazzella, N., Morin, S., 2015.  
779 Herbicide toxicity on river biofilms assessed by pulse amplitude modulated (PAM) fluorometry.  
780 *Aquat. Toxicol.* 165, 160–171. <https://doi.org/10.1016/j.aquatox.2015.05.001>
- 781 Tsui, M.T.K., Chu, L.M., 2003. Aquatic toxicity of glyphosate-based formulations: comparison between  
782 different organisms and the effects of environmental factors. *Chemosphere* 52, 1189–1197.  
783 [https://doi.org/10.1016/S0045-6535\(03\)00306-0](https://doi.org/10.1016/S0045-6535(03)00306-0)
- 784 Vera, M.S., Lagomarsino, L., Sylvester, M., Pérez, G.L., Rodríguez, P., Mugni, H., Sinistro, R., Ferraro,  
785 M., Bonetto, C., Zagarese, H., Pizarro, H., 2010. New evidences of Roundup (R) (glyphosate  
786 formulation) impact on the periphyton community and the water quality of freshwater ecosystems.  
787 *Ecotoxicology* 19, 710–721. <https://doi.org/10.1007/s10646-009-0446-7>
- 788 Walz GmbH, H., 1998. Underwater Fluorometer Diving-PAM. Handbook of Operation.
- 789 Wang, C., Lin, X., Li, L., Lin, S., 2016. Differential Growth Responses of Marine Phytoplankton to  
790 Herbicide Glyphosate. *PLoS One* 11, e0151633.
- 791 Wang, H., Kostel, J.A., St. Amand, A.L., Gray, K.A., 1999. 2. The response of a laboratory stream system  
792 to PCB exposure: study of periphytic and sediment accumulation patterns. *Water Res.* 33, 3749–  
793 3761. [https://doi.org/10.1016/S0043-1354\(99\)00126-8](https://doi.org/10.1016/S0043-1354(99)00126-8)
- 794 Wang, S., Seiwert, B., Miltner, A., Sch, A., Reemtsma, T., Yang, Q., Nowak, K.M., 2016.  
795 (Bio)degradation of glyphosate in water-sediment microcosms e A stable isotope co-labeling



Beecraft and Rooney. 2020. Bioconcentration of glyphosate in wetland biofilms. PREPRINT. Contact [rrooney@uwaterloo.ca](mailto:rrooney@uwaterloo.ca)

- 796 approach. *Water Res.* 99, 91–100. <https://doi.org/10.1016/j.watres.2016.04.041>
- 797 Wickham, H., Averick, M., Bryan, J., Chang, W., D’L., McGowan, A., François, R., Grolemund, G.,  
798 Hayes, A., Henry, L., Hester, J., Kuhn, M., Lin Pedersen, T., Miller, E., Bache, S.M., Müller, K.,  
799 Ooms, J., Robinson, D., Seidel, D.P., Spinu, V., Takahashi, K., Vaughan, D., Wilke, C., Woo, K.,  
800 Yutani, H., 2019. Welcome to the Tidyverse. *J. Open Source Softw.* 4, 1686.  
801 <https://doi.org/10.21105/joss.01686>
- 802 Zebral, Y.D., Lansini, L.R., Costa, P.G., Roza, M., Bianchini, A., Robaldo, R.B., 2018. A glyphosate-  
803 based herbicide reduces fertility, embryonic upper thermal tolerance and alters embryonic diapause  
804 of the threatened annual fish *Austrolebias nigrofasciatus*. *Chemosphere* 196, 260–269.  
805 <https://doi.org/10.1016/j.chemosphere.2017.12.196>
- 806

Low exposure: high bioconcentration factor

**Water**

**Biofilm**

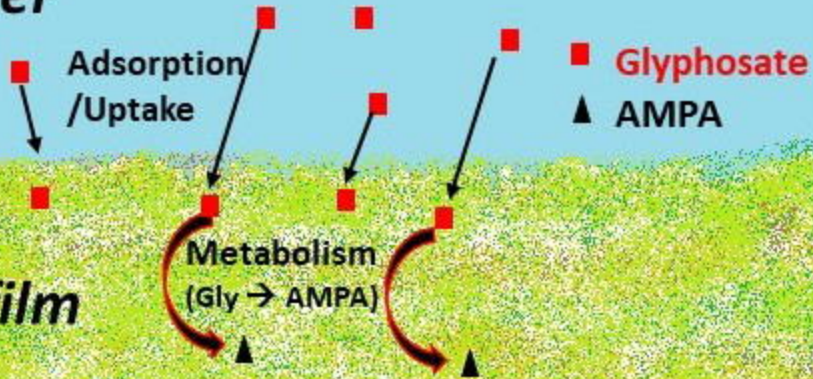

High exposure: lower bioconcentration factor

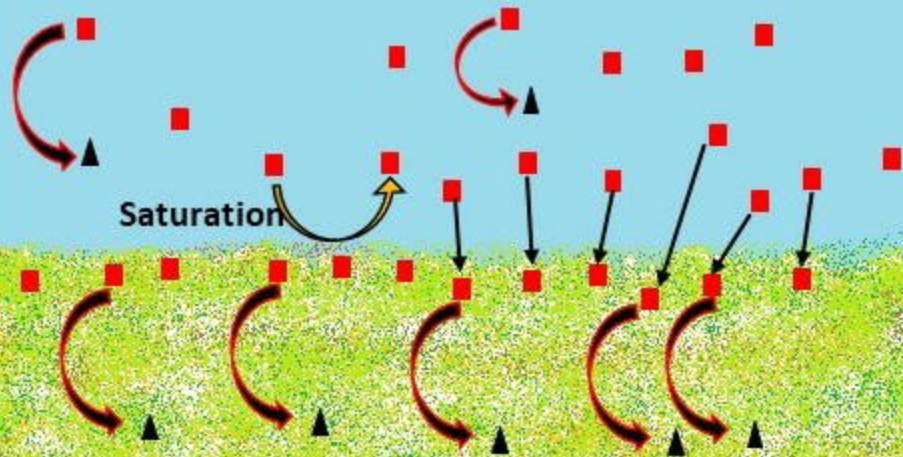

Source: http://biorxiv.org/content/10.1101/2020.08.03.234856v1.full.pdf
